# Supplementary material for: Evidence for the recent origin of a bacterial protein-coding, overlapping orphan gene by evolutionary overprinting
Source: PubMed Central journal article supplement (PMC4683798; doi:10.1186/s12862-015-0558-z), 2015-12-18
Supplement: 12862_2015_558_MOESM1_ESM.pdf [file 12862_2015_558_MOESM1_ESM.pdf]

**Table S3.** *E. coli* strains and plasmids

| Strain or plasmid                    | Relevant characteristics                                                                 | Reference                     |
|--------------------------------------|------------------------------------------------------------------------------------------|-------------------------------|
| <i>E. coli</i> O157:H7 EDL933 (EHEC) | wild type, outbreak strain, obtained from Collection de l'Institute Pasteur (CIP 106327) | (Perna <i>et al.</i> , 2001)  |
| EHEC NaI <sup>R</sup>                | spontaneous nalidixic acid resistant clone of EHEC                                       | this work                     |
| <i>E. coli</i> SM10λpir              | <i>Th-1thr leu tonA lacY supE, recA::RP4-2-Tc::Mu Km<sup>R</sup></i> (λ pir)             | (Miller & Mekalanos, 1988)    |
| <i>E. coli</i> CC118 λpir            | <i>araD139 Δ(ara,leu)7697 ΔlacX74 ΔphoA20 galK thi rpsE rpoB argE(Am) recA1</i> (λ pir)  | (Manoil & Beckwith, 1985)     |
| pMRS101                              | <i>oriR6K strAB mobRK2 sacB bla oriE1</i>                                                | (Sarker & Cornelis, 1997)     |
| pProbe-NT                            | pBBR1 replicon, <i>gfp</i> reporter, Km <sup>R</sup>                                     | (Miller <i>et al.</i> , 2000) |
| pBAD/ <i>Myc-His</i>                 | pBR322-derivative, <i>araBAD</i> promoter, <i>myc</i> C-tag and his-tag fusion           | Invitrogen                    |

## References

- Manoil, C. & J. Beckwith, (1985) TnphoA: a transposon probe for protein export signals. *Proc Natl Acad Sci U S A* **82**: 8129-8133.
- Miller, V. L. & J. J. Mekalanos, (1988) A novel suicide vector and its use in construction of insertion mutations: osmoregulation of outer membrane proteins and virulence determinants in *Vibrio cholerae* requires *toxR*. *J Bacteriol* **170**: 2575-2583.
- Miller, W. G., J. H. Leveau & S. E. Lindow, (2000) Improved *gfp* and *inaZ* broad-host-range promoter-probe vectors. *Mol Plant Microbe Interact.* **13**: 1243-1250.
- Perna, N. T., G. Plunkett, 3rd, V. Burland, B. Mau, J. D. Glasner, D. J. Rose, G. F. Mayhew, P. S. Evans, J. Gregor, H. A. Kirkpatrick, G. Posfai, J. Hackett, S. Klink, A. Boutin, Y. Shao, L. Miller, E. J. Grotbeck, N. W. Davis, A. Lim, E. T. Dimalanta, K. D. Potamouisis, J. Apodaca, T. S. Anantharaman, J. Lin, G. Yen, D. C. Schwartz, R. A. Welch & F. R. Blattner, (2001) Genome sequence of enterohaemorrhagic *Escherichia coli* O157:H7. *Nature* **409**: 529-533.
- Sarker, M. R. & G. R. Cornelis, (1997) An improved version of suicide vector pKNG101 for gene replacement in gram-negative bacteria. *Mol Microbiol* **23**: 410-411.
